## Number needed to treat for net effect of anticoagulation in atrial fibrillation

Ding WY.<sup>1</sup>; Rivera-Caravaca JM.<sup>2</sup>; Marin F.<sup>2</sup>; Li G.<sup>3</sup>; Roldan V.<sup>2</sup>; Lip GYH<sup>1</sup>

<sup>1</sup>University of Liverpool, Liverpool, United Kingdom of Great Britain & Northern Ireland

<sup>2</sup>University of Murcia, Murcia, Spain

<sup>3</sup>Guangdong Second Provincial General Hospital, Guangzhou, China

**Funding Acknowledgements:** Type of funding sources: None.

**Background:** The benefit of oral anticoagulation (OAC) in atrial fibrillation (AF) must be balanced against any potential risk of harm. We aimed to evaluate the "NNT for net effect" (NNTnet) using CARS in anticoagulated patients with AF.

**Methods:** We used patient-level data from the real-world Murcia AF Project and AMADEUS clinical trial. Baseline risk of stroke was calculated using CARS while major bleeding was estimated from prior studies. Stroke and major bleeding events at 1-year were determined. NNTnet was calculated as a reciprocal of the net effect of ARR with OAC ( $NNT_{net} = 1 / (ARR_{stroke} - AR_{bleeding})$ ).

**Results:** 3,511 patients were included (1,306 [37.2%] real-world patients and 2,205 [62.8%] clinical trial). The absolute 1-year stroke risk was similar across both cohorts and the main results are presented in the Table.

In both cohorts, the NNTnet was significantly lower in patients with an excess stroke risk of  $\geq 2\%$  by CARS. Among real-world patients with a very high ( $>10\%$ ) baseline stroke risk, the use of OAC was associated with an  $ARR_{stroke}$  of 10.9% and  $AR_{bleeding}$  of 1.2%, generating an overall NNTnet of 11. In the clinical trial, the use of OAC was associated with an  $ARR_{stroke}$  of 11.0% and  $AR_{bleeding}$  of 0.6%, generating an overall NNTnet of 10.

**Conclusion:** Overall, the NNTnet approach in AF incorporates information regarding baseline risk of stroke and major bleeding, and relative effects of OAC with the potential to include multiple additional outcomes and weighting of events based on their perceived effects by individual patients. This simple and intuitive metric may be useful to improve communication and optimise the patient-centred management of AF.

### NNT in Real-World and Clinical Trial

|                                           | Real-World              | Clinical Trial          |
|-------------------------------------------|-------------------------|-------------------------|
| Ischaemic stroke risk at 1-year           |                         |                         |
| Baseline risk without anticoagulation (%) | 5.7% (95% CI 5.5 - 6.0) | 5.1% (95% CI 4.9 - 5.3) |
| Anticoagulation-mediated risk (%)         | 1.7% (95% CI 1.1 - 2.6) | 1.3% (95% CI 0.8 - 1.8) |
| Absolute risk reduction (%)               | 4.0%                    | 3.8%                    |
| $NNT_{benefit}$                           | 25                      | 27                      |
| Major bleeding risk at 1-year             |                         |                         |
| Baseline risk without anticoagulation (%) | 2.3%                    | 2.3%                    |
| Anticoagulation-mediated risk (%)         | 3.3% (95% CI 2.4 - 4.4) | 3.9% (95% CI 3.1 - 4.8) |
| Absolute risk increase (%)                | 1.0%                    | 1.6%                    |
| $NNT_{harm}$                              | 100                     | 63                      |
| $NNT_{net}$                               | 34                      | 46                      |
